# Supplementary material for: Subtyping of sarcomas based on pathway enrichment scores in bulk and single cell transcriptomes
Source: Springer Nature journal article supplement (doi:10.1186/s12967-022-03248-3), 2022-01-29

Fig. S4

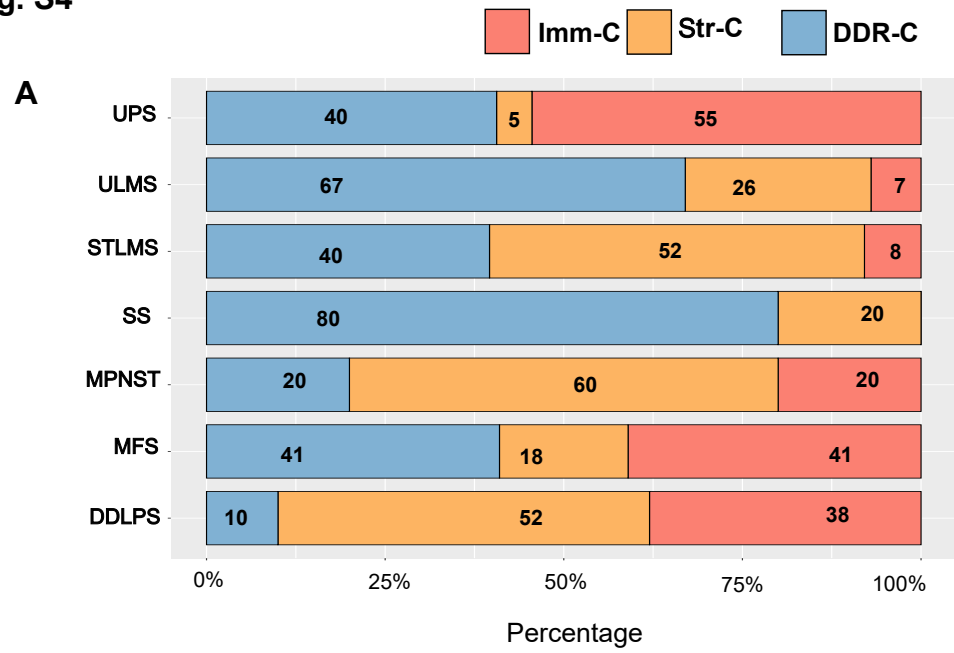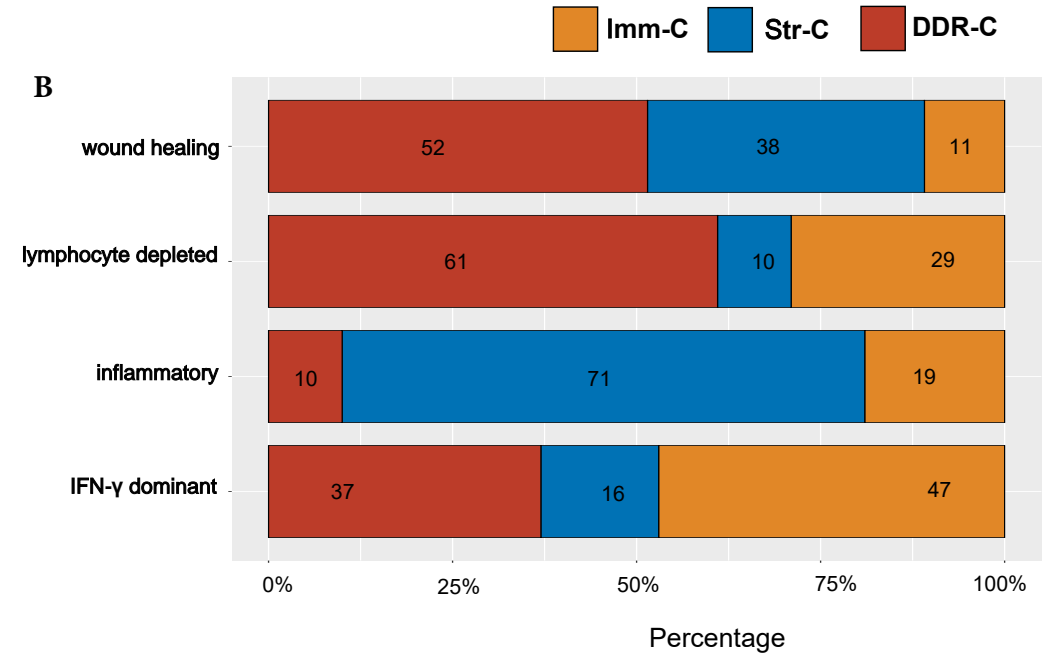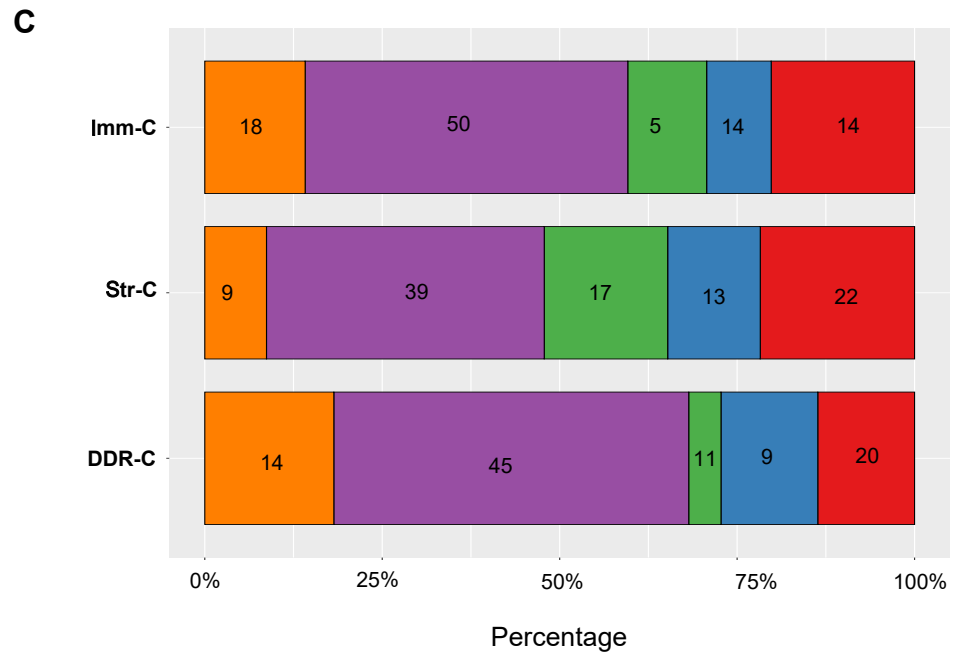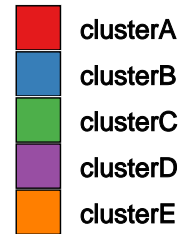

Supplement: MOESM7 [file 20079414]
